# Supplementary material for: Release of Microplastics from Reusable Kitchen Plasticware and Generation of Thermal Potential Toxic Degradation Products in the Oven
Source: MDPI journal article supplement (doi:10.3390/app12052535), 2022-02-28
Supplement: s1 [file s1]

# Supporting Information

Release of microplastics from reusable kitchen plasticware and generation of thermal potential toxic degradation products in the oven

*Juri Jander<sup>1</sup>, Darius Hummel<sup>1</sup>, Sophie Stürmer<sup>1</sup>, Adrian Monteleone<sup>1</sup>, Tizian Neumaier<sup>1</sup>, Felix Broghammer<sup>1</sup>, Uta Lewin-Kretzschmar<sup>2</sup>, Thomas Brock<sup>2</sup>, Andreas Fath<sup>\*1</sup>*

AUTHOR ADDRESS: <sup>1</sup> Faculty of Medical and Life Sciences, Hochschule Furtwangen, Villingen-Schwenningen, Germany; <sup>2</sup> Employer's Liability Insurance Association of Raw Materials and Chemical Industry – (Competence Center Hazardous Substances and Biological Agents), Leuna, Germany,

KEYWORDS: Microplastic, Microplastic Analysis, kitchen plastic bowl, pyrolysis, GC-MS, abrasion

## Corresponding Author

\* Andreas Fath

Postal address: Faculty of Medical and Life Sciences, Hochschule Furtwangen, Jakob-Kienzle-Straße 17, D-78054 Villingen-Schwenningen. Phone:.0049-(0)7720 3074739. E-Mail: fath@hs-furtwangen.de

## Table of Content

### ❖ Supporting tables:

**Table S1.** Components detected using ABS during pyrolysis at 200 °C.

**Table S2.** Components detected using ABS during pyrolysis at 250 °C.

**Table S3.** Components detected using LDPE during pyrolysis at 200 °C

**Table S4.** Components detected using LDPE during pyrolysis at 250 °C

**Table S5.** Components detected using PP during pyrolysis at 200 °C

**Table S6.** Components detected using PP during pyrolysis at 250 °C

**Table S7.** Components detected using SAN during pyrolysis at 200 °C

**Table S8.** Components detected using SAN during pyrolysis at 250 °C

**Table S9.** Components detected using Melamine during pyrolysis at 200 °C

**Table S10.** Components detected using Melamine during pyrolysis at 250 °C

**Table S11.** Components detected using PS during pyrolysis at 200 °C

**Table S12.** Components detected using PS during pyrolysis at 250 °C

## Supporting tables

**Table S1.** Components detected using ABS during pyrolysis at 200 °C.

| Temperature | Main Components                  | Traces                |
|-------------|----------------------------------|-----------------------|
| 200 °C      | Styrene                          | acrylonitrile         |
|             | Acroleine                        | acetone               |
|             | 2-Phenylpropenal                 | benzene               |
|             | Alkanals (acetaldehyd-n-nonanale | ethanol               |
|             | acetophenone                     | furan                 |
|             | 2-Phenylisopropanole             | 2-butanole            |
|             | Methylstyrene                    | Propane nitrile       |
|             | Ethylbenzene                     | aromatic hydrocarbons |
|             | Toluene                          | phenole               |
|             | Cumene                           | alkanes               |
|             | 2-methyl-1-propene               | alkylaromatics        |
|             | 1-Tridecene                      | -                     |

**Table S2.** Components detected using ABS during pyrolysis at 250 °C.

| Temperature | Main Components                  | Traces                |
|-------------|----------------------------------|-----------------------|
| 250 °C      | styrene                          | acrylonitrile         |
|             | Acroleine                        | acetone               |
|             | 2-Phenylpropenal                 | benzene               |
|             | Alkanals (acetaldehyd-n-nonanale | ethanol               |
|             | acetophenone                     | furan                 |
|             | 2-Phenylisopropanole             | 2-butanole            |
|             | Methylstyrene                    | Propane nitrile       |
|             | Ethylbenzene                     | aromatic hydrocarbons |
|             | Toluene                          | phenole               |
|             | Cumene                           | alkanes               |
|             | 2-methyl-1-propene               | alkylaromatics        |
|             | 1-Tridecene                      | -                     |

**Table S3.** Components detected using LDPE during pyrolysis at 200 °C.

| Temperature | Main Components                  | Traces                       |
|-------------|----------------------------------|------------------------------|
| 200 °C      | Acetaldehyde                     | Ethanol                      |
|             | Acetic acid                      | Acrolein                     |
|             | Formic acid                      | acetone                      |
|             | n-butane                         | Propane                      |
|             | n-alkanales (proplanale-nonanale | n-alkanes (pentane-dodecane) |
|             | -                                | Methanol                     |
|             | -                                | n-propanol                   |
|             | -                                | n-butanol                    |
|             | -                                | Butyrolacton                 |
|             | -                                | 2-alkanone                   |
|             | -                                | 3-alkanone                   |

**Table S4.** Components detected using LDPE during pyrolysis at 250 °C.

| Temperature | Main Components                  | Traces                       |
|-------------|----------------------------------|------------------------------|
| 250 °C      | Acetaldehyde                     | Ethanol                      |
|             | n-butane                         | Acrolein                     |
|             | n-alkanales (proplanale-nonanale | acetone                      |
|             | -                                | Propane                      |
|             | -                                | n-alkanes (pentane-dodecane) |
|             | -                                | Methanol                     |
|             | -                                | n-propanol                   |
|             | -                                | n-butanol                    |
|             | -                                | Butyrolacton                 |
|             | -                                | 2-alkanone                   |
|             | -                                | 3-alkanone                   |

**Table S5.** Components detected using PP during pyrolysis at 200 °C.

| Temperature | Main Components        | Traces                   |
|-------------|------------------------|--------------------------|
| 200 °C      | Acetone                | Higher branched alcohols |
|             | Acetic acid            | Saturated hydrocarbons   |
|             | Formic acid            | Unsaturated hydrocarbons |
|             | methacrolein           | Saturated aldehydes      |
|             | acetaldehyde           | Unsaturated aldehydes    |
|             | 2,4-dimethyl-1-heptene | Saturated ketons         |
|             | 2-methyl-1-pentene     | Unsaturated ketones      |
|             | 2-methyl-1-propene     | -                        |
|             | n-pentane              | -                        |
|             | 2,4-pentandion         | -                        |
|             | 2-pentanone            | -                        |
|             | 4-methyl-2-heptanone   | -                        |
|             | Methylisobutylketone   | -                        |
|             | methanol               | -                        |

**Table S6.** Components detected using PP during pyrolysis at 250 °C.

| Temperature | Main Components        | Traces                   |
|-------------|------------------------|--------------------------|
| 250 °C      | Acetone                | Higher branched alcohols |
|             | methacrolein           | Saturated hydrocarbons   |
|             | acetaldehyde           | Unsaturated hydrocarbons |
|             | 2,4-dimethyl-1-heptene | Saturated aldehydes      |
|             | 2-methyl-1-pentene     | Unsaturated aldehydes    |
|             | 2-methyl-1-propene     | Saturated ketons         |
|             | n-pentane              | Unsaturated ketones      |
|             | 2,4-pentandion         | Acetic acid              |
|             | 2-pentanone            | -                        |
|             | 4-methyl-2-heptanone   | -                        |
|             | Methylisobutylketone   | -                        |
|             | methanol               | -                        |



**Table S7.** Components detected using SAN during pyrolysis at 200 °C.

| Temperature | Main Components | Traces        |
|-------------|-----------------|---------------|
| 200 °C      | Styrene         | Cyanide       |
|             | Ethylbenzene    | Acrylonitrile |
|             | -               | Benzaldehyde  |
|             | -               | Acetophenone  |
|             | -               | Phenol        |
|             | -               | Propylbenzene |
|             | -               | Cumene        |
|             | -               | Xylene        |

**Table S8.** Components detected using SAN during pyrolysis at 250 °C.

| Temperature | Main Components | Traces           |
|-------------|-----------------|------------------|
| 250 °C      | acetophenone    | Cyanide          |
|             | Ethylbenzene    | Acrylonitrile    |
|             | Benzaldehyde    | Acetophenone     |
|             | -               | Phenol           |
|             | -               | Propylbenzene    |
|             | -               | Cumene           |
|             | -               | Xylene           |
|             | -               | 2-phenylpropenal |
|             | -               | benzene          |
|             | -               | benzonitrile     |
|             | -               | acetone          |
|             | -               | Acetaldehyde     |
|             | -               | methylstyrene    |

**Table S9.** Components detected using Melamine during pyrolysis at 200 °C.

| Temperature | Main Components | Traces           |
|-------------|-----------------|------------------|
| 200 °C      | Formaldehyde    | Furfural         |
|             | Methanol        | Furfuryl alcohol |
|             | Acetaldehyde    | Acetic acid      |
|             | -               | Hydroxy acetone  |
|             | -               | Butyrolactone    |
|             | -               | 2(5H) furanon    |
|             | -               | 5-methylfurfural |
|             | -               | Acetone          |
|             | -               | Benzaldehyde     |

**Table S10.** Components detected using Melamine during pyrolysis at 250 °C.

| Temperature | Main Components | Traces           |
|-------------|-----------------|------------------|
| 250 °C      | Formaldehyde    | Furfural         |
|             | Methanol        | Furfuryl alcohol |
|             | Acetaldehyde    | Acetic acid      |
|             | Methyl formate  | Hydroxy acetone  |
|             | 2,3-butandion   | Butyrolactone    |
|             | -               | 2(5H) furanon    |
|             | -               | 5-methylfurfural |
|             | -               | Acetone          |
|             | -               | Benzaldehyde     |

**Table S11.** Components detected using PS during pyrolysis at 200 °C.

| Temperature | Main Components          | Traces                |
|-------------|--------------------------|-----------------------|
| 200 °C      | styrene                  | Benzene               |
|             | Benzaldehyde             | Formaldehyde          |
|             | 2-Phenylpropenal         | Acetaldehyde          |
|             | Ethylbenzene             | Benzylalcohol         |
|             | Methylstyrene            | n-alkanes             |
|             | Cumene                   | 2-alkanones           |
|             | Propylbenzene            | benzylmethylketone    |
|             | Phenolphenylacetaldehyde | aromatic hydrocarbons |
|             | Phenyloxirane            | -                     |
|             | acetic acid              | -                     |

**Table S12.** Components detected using PS during pyrolysis at 250 °C.

| Temperature | Main Components          | Traces        |
|-------------|--------------------------|---------------|
| 250 °C      | styrene                  | Benzene       |
|             | Benzaldehyde             | Formaldehyde  |
|             | 2-Phenylpropenal         | Acetaldehyde  |
|             | Ethylbenzene             | Benzylalcohol |
|             | Ethylbenzene             | -             |
|             | Methylstyrene            | -             |
|             | Cumene                   | -             |
|             | Propylbenzene            | -             |
|             | Phenolphenylacetaldehyde | -             |
|             | Phenyloxirane            | -             |
